# Supplementary material for: Development and validation of a nomogram for the prediction of brain metastases in small cell lung cancer
Source: PubMed Central journal article supplement (PMC10214575; doi:10.1111/crj.13615), 2023-04-18
Supplement: CRJ-17-456-s002.pdf [file CRJ-17-456-s002.pdf]

# TRIPOD Checklist: Prediction Model Development and Validation

| Section/Topic                | Item | Checklist Item                                                                                                                                                                                            | Section                            |
|------------------------------|------|-----------------------------------------------------------------------------------------------------------------------------------------------------------------------------------------------------------|------------------------------------|
| <b>Title and abstract</b>    |      |                                                                                                                                                                                                           |                                    |
| Title                        | 1    | D;V Identify the study as developing and/or validating a multivariable prediction model, the target population, and the outcome to be predicted.                                                          | Title                              |
| Abstract                     | 2    | D;V Provide a summary of objectives, study design, setting, participants, sample size, predictors, outcome, statistical analysis, results, and conclusions.                                               | Abstract para 1-4                  |
| <b>Introduction</b>          |      |                                                                                                                                                                                                           |                                    |
| Background and objectives    | 3a   | D;V Explain the medical context (including whether diagnostic or prognostic) and rationale for developing or validating the multivariable prediction model, including references to existing models.      | Intro para 1-2                     |
|                              | 3b   | D;V Specify the objectives, including whether the study describes the development or validation of the model or both.                                                                                     | Intro para 3                       |
| <b>Methods</b>               |      |                                                                                                                                                                                                           |                                    |
| Source of data               | 4a   | D;V Describe the study design or source of data (e.g., randomized trial, cohort, or registry data), separately for the development and validation data sets, if applicable.                               | Methods para 1, Figure 1           |
|                              | 4b   | D;V Specify the key study dates, including start of accrual; end of accrual; and, if applicable, end of follow-up.                                                                                        | Methods para 1, Figure 1           |
| Participants                 | 5a   | D;V Specify key elements of the study setting (e.g., primary care, secondary care, general population) including number and location of centres.                                                          | Methods para 1                     |
|                              | 5b   | D;V Describe eligibility criteria for participants.                                                                                                                                                       | Methods para 1                     |
|                              | 5c   | D;V Give details of treatments received, if relevant.                                                                                                                                                     | NA                                 |
| Outcome                      | 6a   | D;V Clearly define the outcome that is predicted by the prediction model, including how and when assessed.                                                                                                | Methods para 2-4                   |
|                              | 6b   | D;V Report any actions to blind assessment of the outcome to be predicted.                                                                                                                                | NA                                 |
| Predictors                   | 7a   | D;V Clearly define all predictors used in developing or validating the multivariable prediction model, including how and when they were measured.                                                         | Methods para 2-4                   |
|                              | 7b   | D;V Report any actions to blind assessment of predictors for the outcome and other predictors.                                                                                                            | NA                                 |
| Sample size                  | 8    | D;V Explain how the study size was arrived at.                                                                                                                                                            | Methods para 1-4                   |
| Missing data                 | 9    | D;V Describe how missing data were handled (e.g., complete-case analysis, single imputation, multiple imputation) with details of any imputation method.                                                  | Methods para 2-6                   |
| Statistical analysis methods | 10a  | D Describe how predictors were handled in the analyses.                                                                                                                                                   | Methods para 5-7                   |
|                              | 10b  | D Specify type of model, all model-building procedures (including any predictor selection), and method for internal validation.                                                                           | Methods para 5-7                   |
|                              | 10c  | V For validation, describe how the predictions were calculated.                                                                                                                                           | Methods para 5-7                   |
|                              | 10d  | D;V Specify all measures used to assess model performance and, if relevant, to compare multiple models.                                                                                                   | Methods para 5-7                   |
|                              | 10e  | V Describe any model updating (e.g., recalibration) arising from the validation, if done.                                                                                                                 | Methods para 5-7                   |
| Risk groups                  | 11   | D;V Provide details on how risk groups were created, if done.                                                                                                                                             | NA                                 |
| Development vs. validation   | 12   | V For validation, identify any differences from the development data in setting, eligibility criteria, outcome, and predictors.                                                                           | NA                                 |
| <b>Results</b>               |      |                                                                                                                                                                                                           |                                    |
| Participants                 | 13a  | D;V Describe the flow of participants through the study, including the number of participants with and without the outcome and, if applicable, a summary of the follow-up time. A diagram may be helpful. | Figure 1                           |
|                              | 13b  | D;V Describe the characteristics of the participants (basic demographics, clinical features, available predictors), including the number of participants with missing data for predictors and outcome.    | Table 1                            |
|                              | 13c  | V For validation, show a comparison with the development data of the distribution of important variables (demographics, predictors and outcome).                                                          | Table 1                            |
| Model development            | 14a  | D Specify the number of participants and outcome events in each analysis.                                                                                                                                 | Results para 1-2                   |
|                              | 14b  | D If done, report the unadjusted association between each candidate predictor and outcome.                                                                                                                | NA                                 |
| Model specification          | 15a  | D Present the full prediction model to allow predictions for individuals (i.e., all regression coefficients, and model intercept or baseline survival at a given time point).                             | Results para 3, Table 3            |
|                              | 15b  | D Explain how to use the prediction model.                                                                                                                                                                | Results para 3, Tables 4, Figure 3 |
| Model performance            | 16   | D;V Report performance measures (with CIs) for the prediction model.                                                                                                                                      | Results para 4, Figure 4-6         |
| Model-updating               | 17   | V If done, report the results from any model updating (i.e., model specification, model                                                                                                                   | NA                                 |

## TRIPOD Checklist: Prediction Model Development and Validation

|                           |     |     |                                                                                                                                                |                     |
|---------------------------|-----|-----|------------------------------------------------------------------------------------------------------------------------------------------------|---------------------|
|                           |     |     | performance).                                                                                                                                  |                     |
| <b>Discussion</b>         |     |     |                                                                                                                                                |                     |
| Limitations               | 18  | D;V | Discuss any limitations of the study (such as nonrepresentative sample, few events per predictor, missing data).                               | Discussion para 6   |
| Interpretation            | 19a | V   | For validation, discuss the results with reference to performance in the development data, and any other validation data.                      | Discussion para 2-5 |
|                           | 19b | D;V | Give an overall interpretation of the results, considering objectives, limitations, results from similar studies, and other relevant evidence. | Discussion para 1-6 |
| Implications              | 20  | D;V | Discuss the potential clinical use of the model and implications for future research.                                                          | Discussion para 5   |
| <b>Other information</b>  |     |     |                                                                                                                                                |                     |
| Supplementary information | 21  | D;V | Provide information about the availability of supplementary resources, such as study protocol, Web calculator, and data sets.                  | NA                  |
| Funding                   | 22  | D;V | Give the source of funding and the role of the funders for the present study.                                                                  | Funding             |

\*Items relevant only to the development of a prediction model are denoted by D, items relating solely to a validation of a prediction model are denoted by V, and items relating to both are denoted D;V. We recommend using the TRIPOD Checklist in conjunction with the TRIPOD Explanation and Elaboration document.
